# Supplementary material
Source: PubMed Central journal article supplement (PMC3676043)
Supplement: IAI.01271-12_zii999090174so1.pdf [file IAI.01271-12_zii999090174so1.pdf]

**Supplemental Table 1: Real-Time RT-PCR Primers used in this study**

| Organism and Target      | Sequence                                                                            | Reference  |
|--------------------------|-------------------------------------------------------------------------------------|------------|
| <b>Gerbil Primers</b>    |                                                                                     |            |
| IL-1 $\beta$             | Forward 5'- GGTGACACAAGCAGCAACAAA -3'<br>Reverse 5'- CATCACACAGGACAGGTACAGATTCT -3' | (1)        |
| IFN- $\gamma$            | Forward 5'- CCATGAACGCTACACACTGCATC -3'<br>Reverse 5'- GAAGTAGAAAAGAGACAATCTGG -3'  | (1)        |
| IL-17                    | Forward 5'- CCAGAAGGCCCTCAGACTAC -3'<br>Reverse 5'- AGGACCAGGATCTCTTGCTG -3'        | (1)        |
| GAPDH                    | Forward 5'- CATGGCCTTCCGAGTTCT-3'<br>Reverse 5'- TTCTGCAGTCGGCATGTCA-3'             | (2)        |
| Hepcidin                 | Forward 5'- CTGCAACCCCAGGACAGAG-3'<br>Reverse 5'-GGAATAAATAAGGAAGGGAGGGG-3'         | (3)        |
| Gastrin                  | Forward 5'-GCTGGCTCTAGCTACCTTCT-3'<br>Reverse 5'-GACAGGTCTGCTATGAAGTG-3'            | (3)        |
| H,K-ATPase               | Forward 5'-GAGAAGAAGTCATGCAGCCAG-3'<br>Reverse 5'-CAATGGTCTGCATCAGCAC-3'            | (3)        |
| iNOS                     | Forward 5'-GCTTGAAGCGAGGAGCAGGTTGAGGA-3'<br>Reverse 5'-CGCTGGCCTTTTCACCCCATAGGA-3'  | (4)        |
| IL-6                     | Forward 5'-ATGGCTGAAGTCCAAGACC-3'<br>Reverse 5'-GGAATGTCCTCAGCTTGTA-3'              | (4)        |
| KC                       | Forward 5'-CACCCGCTCGCTTCTC-3'<br>Reverse 5'-ATGCTCTTGGGGGTGAATCC-3'                | (4)        |
| <b>Bacterial Primers</b> |                                                                                     |            |
| CagA                     | Forward 5'-TGTGGGAAGCGTTTCTTTGTC-3'<br>Reverse 5'-GCATTGGCTAAAAAGTGCGTAA-3'         | This study |
| 16S rRNA                 | Forward 5'-GGAGTACGGTCGCAAGATTTAA-3'<br>Reverse 5'-CTAGCGGATTCTCTCAATGTCAA-3'       | This study |

#### References

- (1) Yamaoka, Y. et al. *Infect Immun* 2005;73:2205-2212.
- (2) Sugimoto, M., et al. *Cancer Sci* 2009;100:2152-2159.
- (3) Schwartz, P., et al. *Gut* 2012;61:193-201.
- (4) Toyoda, T. et al. *Int. J Cancer* 2009;125:1786-95.
