# Supplementary material
Source: PubMed Central journal article supplement (PMC3676043)

### Acute Inflammation in the Antrum

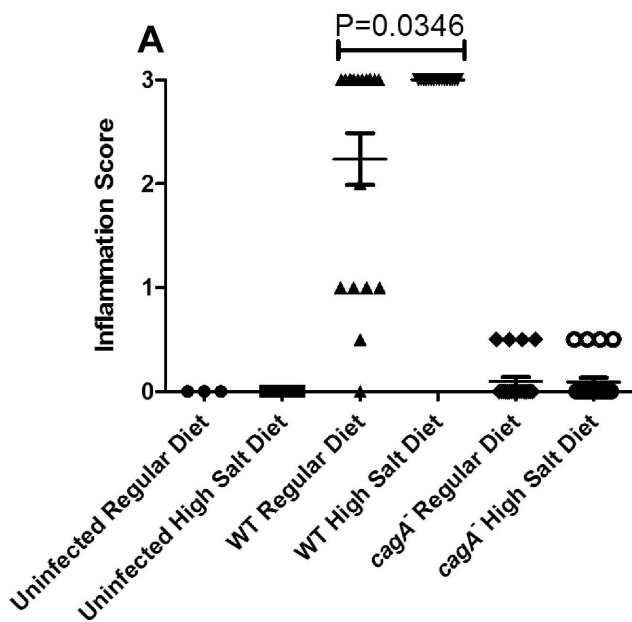

### Chronic Inflammation in the Antrum

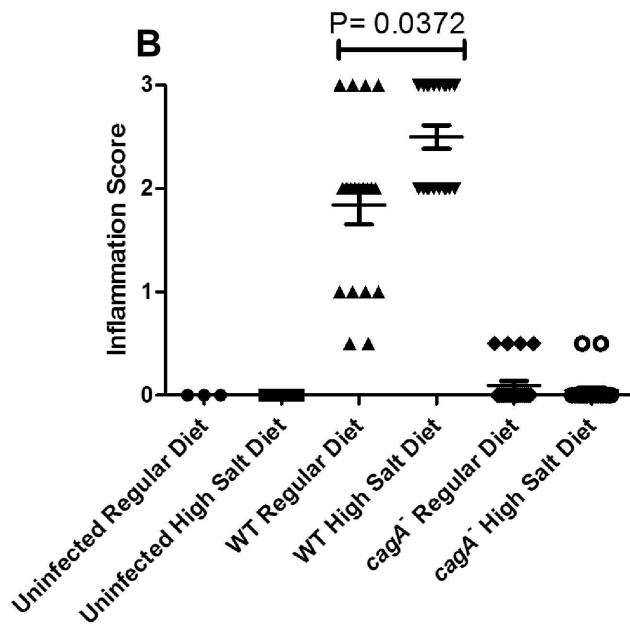

### Acute Inflammation in the Corpus

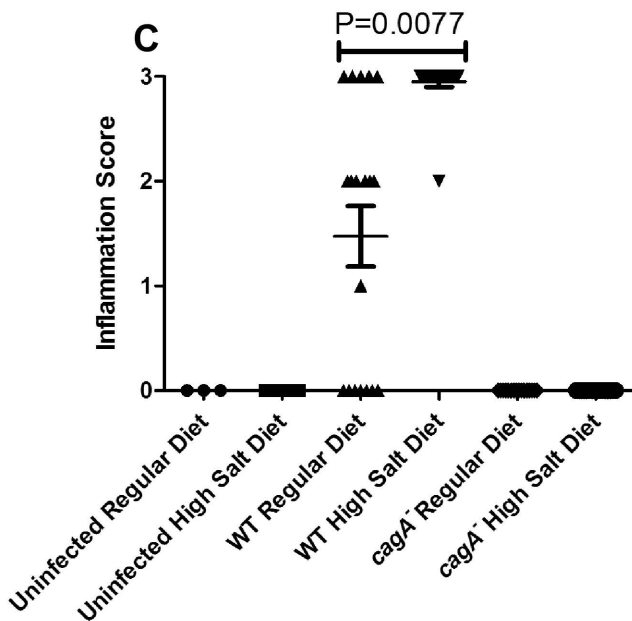

### Chronic Inflammation in the Corpus

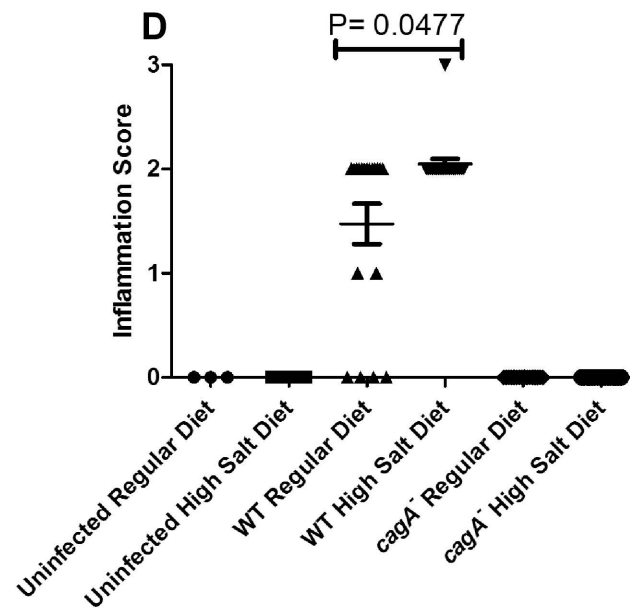

Supplement: IAI.01271-12_zii999090174so2.pdf [file IAI.01271-12_zii999090174so2.pdf]
