# Supplementary material
Source: PubMed Central journal article supplement (PMC3676043)

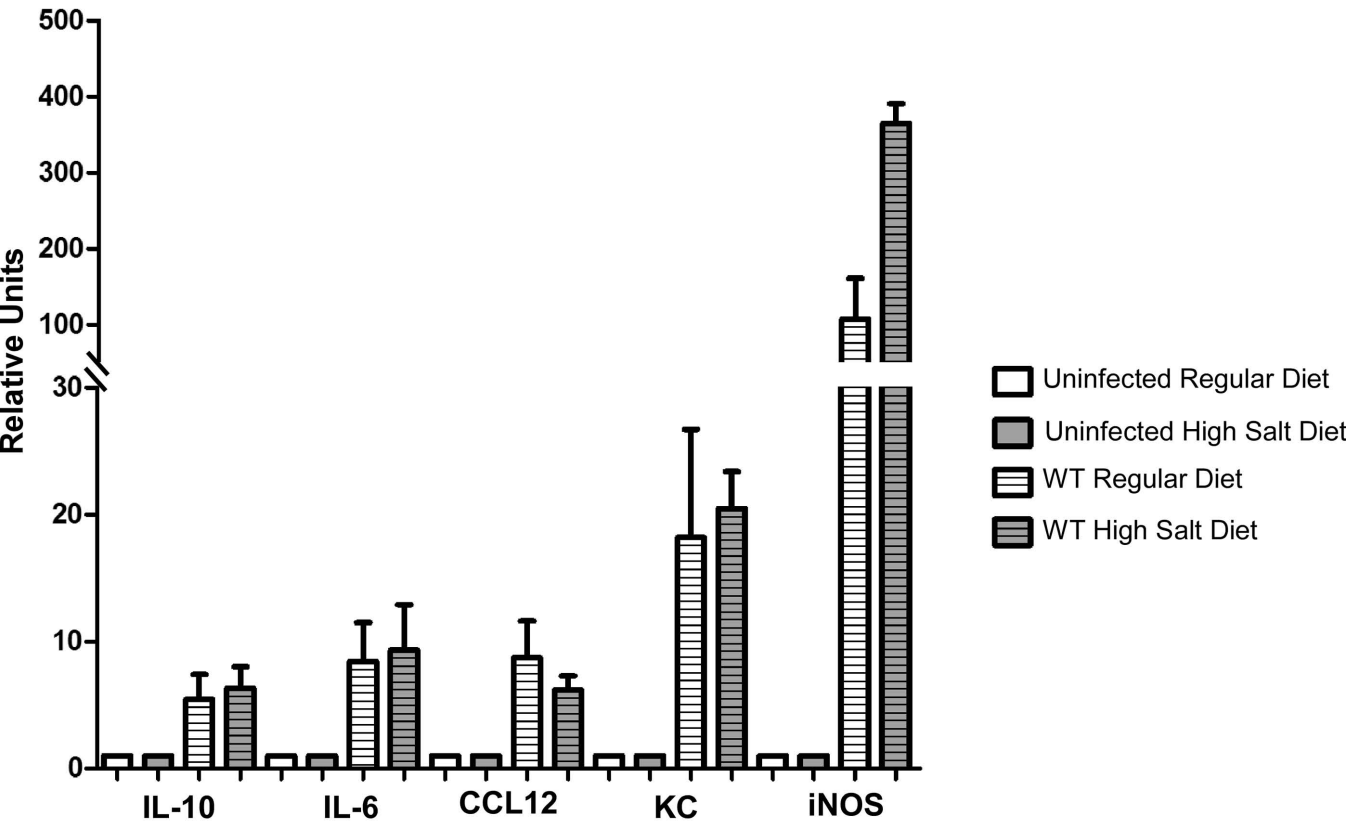

Supplement: IAI.01271-12_zii999090174so4.pdf [file IAI.01271-12_zii999090174so4.pdf]
